# Supplementary figures and images for: A Review of the Publications on Carbon Isotopes in Groundwater and Rainwater
Source: MDPI journal article supplement (doi:10.3390/w15193392), 2023-09-27

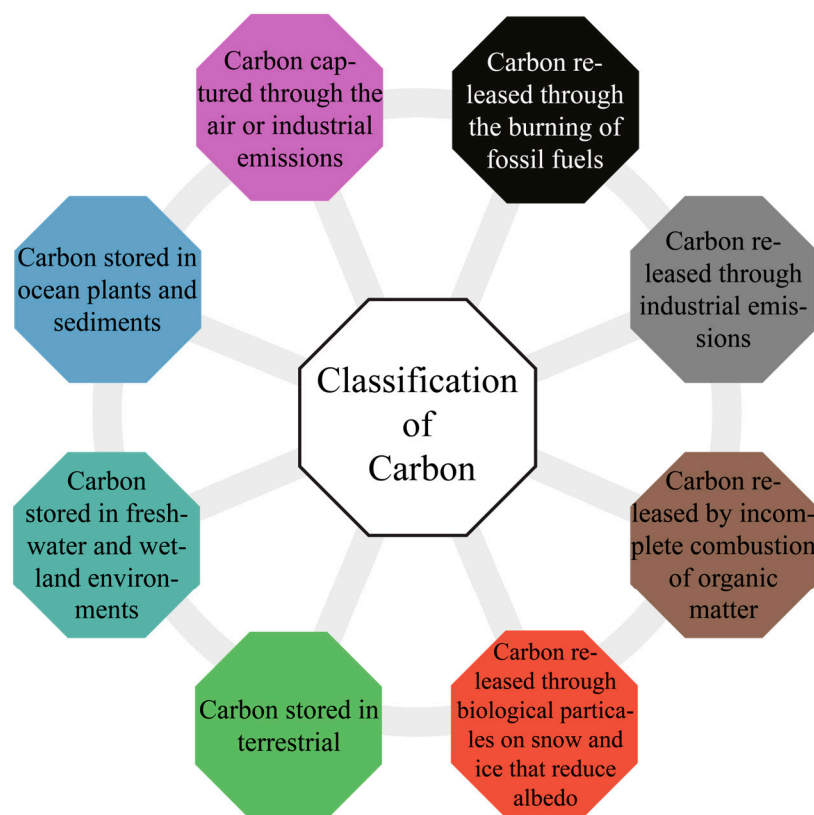

**Figure S1.** USGS carbon classification in colors representing the different sources of carbon.

Supplement: s1 [file s1]
